1 **The effect of memantine, an antagonist of the NMDA glutamate**  
2 **receptor, in *in vitro* and *in vivo* infections by *Trypanosoma cruzi***

3

4 **Authors**

5 Higo Fernando Santos Souza<sup>1\*</sup>, Sandra Carla Rocha<sup>1\*</sup>, Flávia Silva Damasceno<sup>1</sup>,  
6 Ludmila Nakamura Rapado<sup>1</sup>, Elisabeth Mieke Furusho Pral<sup>1</sup>, Claudio Romero Farias  
7 Marinho<sup>2</sup>, Ariel Mariano Silber<sup>1∞</sup>.

8

9 **Institutional affiliations:**

10 1-Laboratory of Biochemistry of Tryps – LaBTryps, Departamento de Parasitologia,  
11 Instituto de Ciências Biomédicas, Universidade de São Paulo, São Paulo, Brazil.

12 2-Laboratory of Experimental Immunoparasitology, Departamento de Parasitologia,  
13 Instituto de Ciências Biomédicas, Universidade de São Paulo, São Paulo, Brazil.

14

15 **Short title:** The *in vivo* trypanocidal activity of memantine

16

17 \*Both authors contributed equally.

18

19 ∞ **Corresponding author:**

20 **Ariel M. Silber.** Prédio Biomédicas II, Av. Lineu Prestes 1374, Sala 24, Cidade  
21 Universitária (05508-900), São Paulo, Brazil. Tel: +55-11-3091-7335, Fax: +55-11-  
22 3091-7417. E-mail: [asilber@usp.br](mailto:asilber@usp.br)

## 24 **Abstract**

25 Chagas disease, caused by *Trypanosoma cruzi*, is a neglected tropical disease that  
26 affects 5-6 million people in endemic areas of the Americas. Presently, chemotherapy  
27 relies on two compounds that were proposed as trypanocidal drugs four decades ago:  
28 nifurtimox and benznidazole. Both drugs are able to eliminate parasitemia and to avoid  
29 seroconversion in infected people when used in the acute phase; however, their use in  
30 the chronic phase (the time when the majority of cases are diagnosed) is limited due to  
31 their serious side effects. Memantine is a glutamate receptor antagonist in the central  
32 nervous system of mammals that has been used for the treatment of Alzheimer's  
33 disease. Our group previously reported memantine as a trypanocidal drug that is able to  
34 induce apoptosis-like death in *T. cruzi*. In the present work, we further investigated the  
35 effects of memantine on the infection of RAW 264.7 macrophages *in vivo* (in BALB/c  
36 mice). Here, we showed that memantine is able to diminish NO and Ca<sup>2+</sup> entry in both  
37 LPS-activated and non-activated cells. These results, together with the fact that  
38 memantine was also able to reduce the infection of macrophages, led us to propose that  
39 this drug is able to activate a pro-oxidant non-NO-dependent cell defense mechanism.  
40 Finally, infected mice that were treated with memantine had diminished parasitemia,  
41 cardiac parasitic load, and inflammatory infiltrates. In addition, the treated mice had an  
42 increased survival rate. Taken together, these results indicate memantine to be a  
43 candidate drug for the treatment of Chagas disease.

## 45 **Author summary**

46 Chagas disease affects approximately 5 million people and is caused by the protist  
47 parasite *Trypanosoma cruzi*. Until now, there are no vaccines to prevent the human  
48 infection, and the therapy relies on the use of two drugs discovered more than 50 years  
49 ago, nifurtimox and benznidazole. Both drugs are efficient during the acute phase of the  
50 disease, however their efficacy in the chronic phase, when most of patients are  
51 diagnosed is controversial. In addition, both drugs are toxic, causing severe side effects  
52 during the treatment. For these reasons, new drugs against *T. cruzi* are urgently needed.  
53 In this work, we report a series of experiments supporting the repositioning of  
54 memantine, a drug used for treating Alzheimer's disease, to treat the *T. cruzi* infection  
55 in an experimental infection model. Our data show that infected mice treated with  
56 memantine have diminished their parasitemia, cardiac parasitic load and inflammatory  
57 infiltrates and more importantly, they have diminished their mortality. Taken together,  
58 these results prompt memantine as a promising drug for treating Chagas disease.

## 60 **Introduction**

61 Chagas disease is caused by the protozoan *Trypanosoma cruzi* and affects 5-6  
62 million people in the Americas (1). Mammals (including humans) become infected  
63 when an infected triatomine insect defecates on the skin and expels metacyclic  
64 trypomastigotes with the feces, one of the nonproliferative, infective forms of the  
65 parasite. These forms are able to internalize into mammalian hosts through the mucosa  
66 and small wounds caused by scratching. Once inside the mammalian host, the  
67 metacyclic trypomastigotes invade the host cells to reach the cytoplasm, where they  
68 initiate their proliferation as amastigotes. After a variable number of cellular divisions,  
69 amastigotes undergo a complex differentiation process, yielding a new generation of  
70 infective, nonproliferative forms called trypomastigotes. These trypomastigotes burst  
71 from the infected cells into the extracellular environment and are able to infect the  
72 neighboring cells or to reach the bloodstream, allowing them to extend the infection to  
73 other tissues. Eventually, the bloodstream trypomastigotes can be taken by the blood to  
74 a new, noninfected triatomine insect during its blood-meal, can infect the insect, and can  
75 convert this newly infected insect into a new transmitter of the infection (2).

76 Chagas disease can be divided into two phases: acute and chronic. The acute  
77 phase is mainly asymptomatic with evident parasitemia and undetectable levels of IgG  
78 antibodies. The chronic phase is characterized by a robust humoral response with high  
79 titers of IgG antibodies and subpatent parasitemia. The chronic phase persists for the  
80 host's lifespan. Most patients in the chronic phase (60-70%) are asymptomatic.  
81 However, the remaining 30-40% of chronic patients develop recognizable clinical  
82 symptoms. The most frequent symptoms are heart hypertrophy and dilatation,  
83 esophagus and large intestine dilatations (megavisceras), or a combination of both  
84 (reviewed by (3, 4)). The treatment of the chagasic infection is largely unsatisfactory

85 (5). Presently, two drugs discovered approximately 50 years ago are available  
86 nifurtimox (Nf) and benznidazole (Bz). Both drugs are highly effective in the acute  
87 phase. However, their efficacy in treating the chronic phase, when most patients are  
88 diagnosed, is limited due to the serious side effects that occur from the toxicity of the  
89 drugs and the long-term treatment required in this phase. Importantly, the emergence of  
90 resistant parasites was reported. In view of these facts, there is an urgent need to look  
91 for new drugs to treat *T. cruzi* infections (3, 6).

92 Our group has been exploring drug reposition strategies, consisting of the  
93 identification of new uses for drugs already approved for the treatment of any disease in  
94 humans (7, 8). In a previous work, Paveto et al. suggested the existence of an L-  
95 glutamate receptor N-methyl-D-aspartate (NMDA) type in *T. cruzi*, which would be  
96 analogous to those reported in neural cells (9). Additionally, our group characterized a  
97 *T. cruzi* glutamate transporter (10) that could behave as a glutamate receptor. More  
98 recently, we showed the sensitivity of *T. cruzi* to memantine (1,2,3,5,6,7-hexahydro-  
99 1,5:3,7-dimethano-4-benzoxonin-3-yl) amines, a tricyclic amine with a low-to-moderate  
100 affinity for the *N*-methyl-D-aspartate (NMDA) receptor (11), which has been indicated  
101 for the treatment of Alzheimer's disease (12). More specifically, we showed that  
102 memantine presented an apoptotic-like activity in *T. cruzi* epimastigotes as well as a  
103 trypanocidal effect in infected mammalian cells (11). In the present work, we show that  
104 memantine affects the infection of macrophages by *T. cruzi*, diminishing the number of  
105 infected cells. We also report that, in addition to its effect on the parasite, memantine  
106 modifies macrophage activation by slightly diminishing both NO production and  
107 intracellular Ca<sup>2+</sup> levels in activated and non-activated macrophages. Finally, infected  
108 mice treated with memantine presented a diminished parasitemia peak, heart parasitic

109 load, inflammatory infiltrates, and mortality. As a whole, this work proposes memantine  
110 to be an interesting drug to be further explored for the treatment of Chagas disease.

111

## 112 **Materials and Methods**

### 113 **Reagents**

114 Memantine was purchased from Tocris Bioscience (Minneapolis, MN, USA). The DNA  
115 extraction kit, DNAeasy Blood and Tissue Kit, was purchased from Qiagen (Hilden,  
116 DE). Culture medium and fetal calf serum (FCS) were purchased from Cultilab  
117 (Campinas, SP, Brazil). Fluo-4 AM were purchased from Invitrogen (Eugene, Oregon,  
118 USA). The MTT [3-(4,5-dimethylthiazol-2-yl)-2,5-diphenyltetrazolium bromide] assay,  
119 the bioluminescent somatic cells kit, lipopolysaccharide from *Escherichia coli* (LPS)  
120 and Griess reagent were purchased from Sigma-Aldrich (St. Louis, MO, USA). The  
121 dichloro-dihydro-fluorescein diacetate (DCFH-DA) assay, Reverse Transcription  
122 *SuperScriptIII* kit, Trizol reagent, SYBR Green Master Mix, fluo-4 AM and Hoechst  
123 33258 were purchased from Thermo Fisher Scientific (Carlsbad, CA, USA).

### 124 **Animals**

125 Six- to eight-week-old BALB/c female mice were obtained from the animal facility of  
126 the Department of Parasitology of ICB, USP. The animals were kept under controlled  
127 climatic conditions with free access to food and water (*ad libitum*). All laboratory  
128 procedures involving animals were previously authorized by the Ethics Committee on  
129 Animal Use for ICB-USP (Protocol 107, Fls 132, Book 02).

### 130 **Mammalian cells and parasites**

131 The RAW 264.7 (macrophage) cell line was routinely cultivated in RPMI 1640 medium  
132 supplemented with 10% heat-inactivated fetal calf serum (FCS), supplemented with 2  
133 mM sodium pyruvate, 0.15% (w/v) NaCO<sub>3</sub>, 100 units mL<sup>-1</sup> penicillin and 100 µg mL<sup>-1</sup>

134 streptomycin at 37 °C in a humid atmosphere containing 5% CO<sub>2</sub>. Tissue culture-  
135 derived trypomastigotes of the *T. cruzi* Y-strain were obtained from infections of the  
136 LLC-MK<sub>2</sub> cell line (multiplicity of infection: 10 trypomastigotes/cell) as previously  
137 described (13). Trypomastigotes were collected from the supernatant of LLC-MK<sub>2</sub> cells  
138 at days 6 to 10 postinfection and were transferred to other bottles for new passages  
139 and/or used for infection assays. The bloodstream trypomastigote form of the *T. cruzi*  
140 Y-strain was maintained by infecting the BALB/c mice. The recovery of  
141 trypomastigotes was performed weekly and was used for the infection assays.

#### 142 **Determination of RAW 264.7 macrophage viability**

143 RAW 264.7 cells (5.0 x 10<sup>5</sup> cells mL<sup>-1</sup>) were cultured in 24-well plates in RPMI  
144 medium supplemented with FCS (10%) in the presence of different concentrations of  
145 memantine (ranging from 10 to 800 µM) or none (control). Cell viability was evaluated  
146 48 h after the initiation of treatment using an MTT assay (3-(4,5-dimethylthiazol-2-yl)-  
147 2,5-diphenyltetrazolium bromide) (14). The inhibitory concentration of 50% of cells  
148 (IC<sub>50</sub>) was determined by fitting the data to a typical dose-response sigmoidal curve  
149 using the program OriginPro8.

#### 150 **Effect of memantine on the intracellular amastigote of *T. cruzi***

151 RAW 264.7 cells (2.5 x 10<sup>4</sup> per well) were cultivated on coverslips in 24-well plates in  
152 RPMI medium (10% FCS) and kept at 37 °C. After 24 h, the cells were infected with  
153 the trypomastigote form of the Y-strain (2.5 x 10<sup>5</sup> per well) for 4 h. After this time, free  
154 parasites were removed by washing twice with PBS; RPMI medium (10% FCS) was  
155 replaced, and the cells were treated with different concentrations of memantine (range  
156 10 µM to 100 µM) for the following 72 h. Then, the cells were washed with PBS, fixed  
157 with 4% paraformaldehyde for 5 min, washed again and treated with Hoechst 33258 for  
158 1 min. After washing, the cells were observed by fluorescence microscopy. The infected

159 cells were counted from a sample of 400 randomly chosen cells for determination of the  
160 infection rate. The number of amastigotes was also counted to determine the rate of  
161 amastigote per cell.

### 162 **Evaluation of the nitric oxide (NO) production from RAW 264.7 macrophage** 163 **culture**

164 Macrophages require activation by particular quantities of *Escherichia coli*-derived LPS  
165 for NO production detection. Thus, a dose-response curve was produced to determine  
166 the ideal concentration of LPS required for activating the RAW 264.7 cells. The  
167 macrophages were stimulated with different concentrations of LPS ranging from 1 to  
168 100 µg/ml for 24, 48 and 72 h. The NO evaluation was based on the nitrite leased  
169 measure from the supernatant of the cultured cells. The RAW 264.7 cells ( $2.5 \times 10^5$   
170 cells mL<sup>-1</sup>) were cultured in 96-well plates in RPMI medium (10% FCS) in the presence  
171 of different concentrations of memantine (ranging from 1 to 100 µM) or none (control)  
172 and were stimulated by 10 µg/ml LPS for 24 h or no stimulation. Over this period, the  
173 nitrite concentration of the cell supernatant was quantified using the Griess reaction, as  
174 described by (15).

### 175 **Evaluation of the gene expression of inducible NO synthase in RAW 264.7** 176 **macrophages**

177 To evaluate the gene expression of inducible nitric oxide synthase,  $2 \times 10^6$  cells per well  
178 were cultured for 18 h in 6-well plates in RPMI medium (10% FCS) in the presence of  
179 different concentrations of memantine (ranging from 1 to 100 µM) or none (control) and  
180 were stimulated by 10 µg/ml LPS for 18 h. After the incubation time, the supernatant  
181 was discarded, and the adhered cells were homogenized with Trizol for RNA extraction  
182 (Thermo Fisher Scientific). cDNA was synthesized using the Reverse Transcription Kit  
183 *SuperScriptII* (Thermo Fisher Scientific). qPCR was performed with *SYBR Green*



184 (Fermentas) for detecting the gene expression levels of iNOS. All reactions were run in  
185 triplicate on an Eppendorf RealPlex Real Time PCR System (Eppendorf) with the  
186 standard thermal cycling conditions. The runs were normalized with the ACT- $\beta$  gene.  
187 The threshold cycle ( $2^{-\Delta\Delta C_t}$ ) method of comparative PCR was used for the data analysis.

#### 188 **Analysis of intracellular Ca<sup>2+</sup> levels in RAW 264.7 macrophages**

189 Cells ( $2.5 \times 10^4$  cells/well) were cultivated in 96-well plates in RPMI medium (10%  
190 FCS), stimulated or not stimulated (control) with LPS, and treated or not treated  
191 (control) with different concentrations of memantine (ranging between 1 and 100  $\mu$ M)  
192 for 24 h. Then, 5  $\mu$ M fluo-4 AM (Invitrogen) was added to the cultures for 1 h. After the  
193 incubation, the cells were washed twice with HEPES-glucose (50 mM HEPES, 116 mM  
194 NaCl, 5.4 mM KCl, 0.8 mM MgSO<sub>4</sub>, 5.5 mM glucose and 2 mM CaCl<sub>2</sub>, pH 7.4). The  
195 reading was performed on a Spectra Max M3 fluorometer, Molecular Devices, using  
196 excitation  $\lambda$  490 nm and emission  $\lambda$  518 nm (11).

#### 197 **Evaluation of parasitemia and survival of BALB/c mice**

198 Blood samples were obtained from the tails of *T. cruzi*-infected mice ( $1 \times 10^3$   
199 trypomastigotes per mouse) treated with or without memantine. On the days of  
200 parasitemia peaks, the number of trypomastigotes was quantified in 25 microscope  
201 fields at 400x magnification with 10  $\mu$ L of blood (Nikon Eclipse E200) (16). The  
202 survival of the mice was also monitored for 40 days postinfection.

#### 203 **Quantification of the tissue parasite load**

204 On the 15<sup>th</sup> day postinfection, samples of lung, spleen, bladder, heart, intestine, and  
205 skeletal muscle were obtained from the infected BALB/c mice for the quantification of  
206 the parasite load. The fragments were transferred to formaldehyde (10%) and were then  
207 processed by gradual dehydration in ethanol solutions, followed by immersion in  
208 xylene, and subsequently embedded in paraffin. Tissue sections 5  $\mu$ m thick were

209 obtained and stained with hematoxylin and eosin (H&E) and analyzed by light  
210 microscopy. The number of amastigote nets was counted in 20 random microscope  
211 fields using a 400x magnification. In parallel, tissue fragments were submitted for DNA  
212 extraction using the DNAeasy Blood and Tissue Kit as recommended by the  
213 manufacturer. The tissue parasitic load was also performed using quantitative PCR as  
214 previously described (17). The cycle threshold values obtained by the Eppendorf  
215 RealPlex software were converted to the number of parasites per 5 ng of tissue DNA.  
216 Their averages were normalized according to the TNF- $\alpha$  gene.

### 217 **Histopathological analysis in the cardiac tissue**

218 Cardiac tissue sections 5  $\mu$ m thick were obtained on the 15<sup>th</sup> day postinfection, stained  
219 with H & E and analyzed by light microscopy. Six nonconsecutive slides from the heart  
220 of each mouse were analyzed in a blinded fashion. Areas of inflammatory infiltrates  
221 were quantified by an image analysis system (Bioscan Optimas; Bioscan Inc., Edmonds,  
222 Wash). The sum of the infiltrated areas from the six slides was calculated for each  
223 mouse. The final individual score was expressed in square micrometers of inflammatory  
224 infiltrates per square millimeter of area examined.

### 225 **Statistical analysis**

226 The experimental data were input into GraphPad Prism version 4.0 software for  
227 construction of the graphs. In addition, t-tests or one-way ANOVA analyses were  
228 performed, followed by Tukey's and logrank tests for statistical analysis. Differences  
229 with a *p* value <0.05 were considered statistically significant.

## 230 **Results**

### 231 ***In vitro***

### 232 **Memantine affects the intracellular cycle of *T. cruzi***

233 To verify the effect of memantine on the intracellular cycle of *T. cruzi*, the effect of the  
234 treatment after the infection was evaluated. First, we evaluated the toxicity of  
235 memantine in macrophages of the RAW 264.7 lineage. The cells were treated with  
236 different concentrations of memantine (10 – 800  $\mu$ M) for 24, 48 and 72 h; we observed  
237 that the macrophages tolerated memantine at concentrations up to 100  $\mu$ M, showing an  
238  $IC_{50}$  of  $580 \pm 22 \mu$ M,  $279 \pm 2 \mu$ M and  $257 \pm 4.7 \mu$ M, respectively (**Fig 1A-F**).

239 Once the cytotoxic effect of memantine was evaluated, the RAW 264.7 macrophages  
240 were subjugated to infection. For this, the cells were incubated with trypomastigotes for  
241 3 h, and then the trypomastigotes remaining in the supernatants were washed out. The  
242 infected cells were incubated for 12 h at 37 °C. Then, the culture medium was replaced  
243 with culture medium containing different concentrations of memantine (1-100  $\mu$ M).  
244 These treatments were maintained for 72 h. The treatment reduced the number of  
245 infected cells at all concentrations tested when compared to the control group (**Fig 2**).

### 246 **Memantine at low (but not at high) concentrations reduces NO** 247 **production in RAW 264.7 macrophages *in vitro***

248 Due to the ability of memantine to reduce the number of infected cells in a dose-  
249 dependent manner, we were interested in checking whether memantine was acting as a  
250 trypanocidal compound by inducing macrophage activation. To evaluate the possible  
251 effect of memantine on the activation of RAW 264.7 macrophages, we first evaluated  
252 their sensitivity to LPS, a well-known macrophage activator (control). For this, the cells  
253 were incubated with different concentrations of LPS (1-100  $\mu$ g/ml) for 24 h, and we  
254 considered the ability of the cells to produce NO as a measurement of activation. The  
255 NO production increased linearly with the LPS concentration; thus, among the  
256 concentrations tested, we chose 10  $\mu$ g/ml (the maximum concentration tested) for  
257 further experiments (**S1A Figure**). Next, we performed a time-course experiment to

258 follow the NO production for up to 72 h. We observed a significant increase in the  
259 period of 24 h, followed by a plateau that was maintained at 48 and 72 h (**S1B Figure**).  
260 We then evaluated the effect of memantine treatment (1-100  $\mu$ M) on nitric oxide (NO)  
261 production and iNOS gene expression after 24 h of LPS stimulation. Unexpectedly,  
262 memantine treatment showed a reduction in nitrite production at concentrations of 10  
263 and 50  $\mu$ M, as well as in the expression of iNOS mRNA. Interestingly, the  
264 concentration of 100  $\mu$ M did not interfere with NO production, which suggests a dose-  
265 dependent anti-inflammatory effect (**Fig 3A-B**).

### 266 **Memantine reduces intracellular $Ca^{2+}$ levels in RAW 264.7** 267 **macrophages**

268 It is known that the pathological activation of NMDA receptors, either by direct or  
269 indirect mechanisms, possibly results in an increase of intracellular calcium (18). Based  
270 on these observations, we evaluated the possible variations in the concentration of  
271 intracellular calcium levels in non-activated and LPS-activated RAW 264.7 cells treated  
272 with two different concentrations of memantine (1-100  $\mu$ M). Exposure of the LPS-  
273 activated cells to memantine resulted in a dose-dependent decrease in intracellular  
274 calcium levels (**Fig 3C**). Remarkably, this effect was dependent on macrophage  
275 activation since no differences in the intracellular calcium levels were observed in the  
276 non-activated cells.

### 277 ***In vivo***

### 278 **Memantine treatment reduces parasitemia and increases the survival** 279 **of *T. cruzi*-infected BALB/c mice**

280 Since memantine showed a reduction in the number of infected cells *in vitro*, we  
281 considered it relevant to evaluate memantine's effect *in vivo*. The available clinical data  
282 shows the concentration administered in the treatment of patients with

283 neurodegenerative diseases and the reported side effects for the use of memantine in  
284 other animal models (ataxia, muscle relaxation, and amnesia); the side effects were only  
285 observed in relatively high doses related to the concentration considered to be of  
286 therapeutic importance (19), and we chose 10 mg/kg of body weight as the ideal  
287 concentration for our trial. BALB/c mice infected with  $1 \times 10^3$  bloodstream  
288 trypomastigotes were treated for 10 consecutive days. The treated animals showed  
289 decreased parasitemia on the days corresponding to the parasitemic peak (7 to 10 d.p.i)  
290 by approximately 40% compared to the control group (**Fig 4A**). The mouse survival rate  
291 was 12.5% compared to the control group survival rate of 7.5% ( $p = 0.0347$ ) (**Fig 4B**).  
292 In summary, memantine treatment decreased parasitemia and extended the survival of  
293 infected BALB/c mice.

#### 294 **The memantine treatment reduces the parasitic load and increases the** 295 **inflammatory infiltrate in the heart of infected BALB/c mice**

296 To evaluate the effect of memantine on the parasitic load in different tissues from  
297 treated mice, we performed real-time PCR to quantify the number of parasites. For this,  
298 we obtained DNA (equivalent to 5 ng of tissue DNA ( $P_E/5$  ng DNA) from the heart,  
299 bladder, intestine, skeletal muscle and liver. Among the evaluated tissues, the heart  
300 showed the highest parasitic load (equivalent to  $3,427 \pm 451 P_E/5$  ng DNA). The  
301 memantine-treated mice showed a significant reduction in the parasitic load in the heart  
302 (35.3%) compared to the parasitic load in the values obtained from the control mice  
303 ( $p < 0.05$ ) (**Fig 5A; S2A – E Figure**). Remarkably, the quantification of the number of  
304 amastigote nests per  $\text{mm}^2$ , evaluated by microscopy observation, confirmed these data:  
305 the hearts from the control mice demonstrated a mean of  $2.3 \pm 0.35$  nests/ $\text{mm}^2$ , while  
306 the memantine-treated mouse hearts showed a mean of  $1.2 \pm 0.15$  nests/ $\text{mm}^2$  (a  
307 reduction of approximately 45%, **Fig 5B**). Moreover, we also observed that the area of

308 the inflammatory infiltrates (normalized per mm<sup>2</sup>) was significantly reduced in the  
309 treated heart tissues: those from the treated animals showed a mean value of  $8.66 \pm 4.15$   
310 inflammatory infiltrate/mm<sup>2</sup>, while those from the control group presented a mean value  
311 of  $80.53 \pm 31.73$  inflammatory infiltrate/mm<sup>2</sup> (**Fig 5C**, as an illustrative example of the  
312 amastigote nests and infiltrates in treated mice vs control mice see **Fig 5D**).  
313 All the obtained data for the parasitic load, amastigote nest and inflammatory infiltrate  
314 quantification demonstrate that treatment with memantine reduces the risk of tissue  
315 parasitic-associated damage, both by diminishing the parasitic load and by diminishing  
316 the inflammatory response.

## 317 **Discussion**

318 In the present work, we provide evidence of the therapeutic potential of memantine in  
319 the *in vitro* and experimental infection by *T. cruzi*. As memantine is currently used in  
320 patients with moderate to severe stages of Alzheimer's disease (12), we propose to  
321 further study its repurposing to treat the infection by *T. cruzi*.

322 Under pathological conditions, memantine is used as a noncompetitive antagonist drug  
323 of the voltage-dependent N-methyl-D-aspartate (NMDA) receptor to block the effects of  
324 elevated glutamate levels (20). The NMDA receptor belongs to the family of ionotropic  
325 glutamate receptors and is involved in a variety of central nervous system (CNS)  
326 functions and processes (21). In mammals, these receptors play important physiological  
327 roles, and despite their predominance in the CNS, NMDA receptors have also been  
328 identified in peripheral and visceral sites located on the postsynaptic dendrite  
329 membranes (21, 22). In *T. cruzi*, there are no reports in the literature on the presence of  
330 a canonical NMDA-type glutamate receptor. However, as previously mentioned, our  
331 group showed that *T. cruzi* epimastigotes are responsive to NMDA (23). This  
332 information is compatible with our previous finding that the CL-14 strain of *T. cruzi* is

333 susceptible to memantine and that amastigotes infecting CHO-K<sub>1</sub> cells are the most  
334 susceptible forms *in vitro* (11). Here, we show that treatment with memantine  
335 significantly reduces the infection rate (infected/noninfected cells) in RAW 264.7  
336 macrophages. However, as memantine diminishes NO production in infected  
337 macrophages, it is unlikely to attribute its effect of an increase in the host cell natural  
338 defense mechanism against the parasite. Therefore, other possible mechanisms altering  
339 the viability of the intracellular amastigotes were explored. Our data show that  
340 memantine induced an increase in mitochondrial function in relation to the control cells.  
341 Similarly, Prado demonstrated that Neuro-2A neural cells increased their mitochondrial  
342 reducing power when pretreated with 0.5-50  $\mu$ M memantine. However, when the same  
343 cells were treated with lower memantine concentrations, the calcium influx was  
344 decreased with the concomitant increase in the mitochondrial reducing power (24).  
345 Additionally, Chen and colleagues observed that memantine at low doses may play an  
346 anti-inflammatory and neuroprotective role, although the anti-inflammatory effects are  
347 still uncertain (25). These findings corroborate our data, where memantine induced a  
348 decrease in NO production in LPS-stimulated RAW 264.7 macrophages (10  $\mu$ g/mL) at  
349 concentrations of 10 and 50  $\mu$ M memantine. However, the concentration of 100  $\mu$ M  
350 memantine suggests a pro-oxidant effect in our assays. Additionally, memantine was  
351 shown to have potential effects as a neurotransmitter and a neuroprotective compound  
352 (26), to inhibit the ATP-sensitive potassium channels (K<sup>+</sup>/ATP) in substantia nigra  
353 (dopaminergic) neurons (27) and to suppress the internal currents induced by  
354 electroporation (28). In fact, Tsai and colleagues demonstrated that the concentrations  
355 used to inhibit at 50% the internal rectifying potassium channels (IK (IR)) is similar to  
356 the memantine IC<sub>50</sub> (12  $\mu$ M) in RAW 264.7 macrophages. These channels act as  
357 metabolic sensors and are sensitive to ATP, that is, when calcium levels are high,

358 closure of the channel occurs (29). We previously demonstrated that memantine affects  
359 the energetic metabolism of the parasite, inducing decreased levels of ATP and  
360 triggering mechanisms that lead to apoptosis in epimastigotes of *T. cruzi* (CL strain,  
361 clone 14) (11). In the present work, we showed that 100  $\mu$ M memantine induces a  
362 decrease in the intracellular calcium levels in both LPS-stimulated and nonstimulated  
363 cells. This supports the hypothesized macrophage NMDA receptor (30), suggesting that  
364 memantine would be able to block it. This is consistent with the previous observation  
365 that, in lymphocytes, NMDA receptors are involved in the regulation of intracellular  
366 calcium levels (31) as well as the levels of ROS (32).

367         Since memantine decreased *T. cruzi* infection in macrophages *in vitro*, we  
368 evaluated the effect of memantine treatment on infection *in vivo*. The treatment of  
369 BALB/c mice infected with Y strain bloodstream trypomastigotes with memantine for  
370 10 consecutive days reduced the parasitemia by 40% during the parasitemic peak when  
371 compared to the control group. Importantly, the dose used in our work (10 mg/kg per  
372 day) can be considered safe: doses of 10 mg or 20 mg per day were shown to be  
373 beneficial for mice in terms of improving the functional capacity of daily activities and  
374 the behavioral disorders characteristic of Alzheimer's disease (33).

375         During the acute phase of Chagas disease, it is known that the parasites are  
376 present in many tissues of the host. Our data showed a high parasitic load in the heart  
377 with  $3427 \pm 451$  parasites equivalent to 5 ng tissue DNA (PE/5 ng DNA). As observed,  
378 memantine, at the dose used, was able to significantly reduce the tissue parasitic load in  
379 this tissue by approximately 35.3%. It was reported that animals inoculated with the  
380 trypomastigote form of the Y strain show an extremely high parasitic load on the 7th  
381 and 8th d.p.i. in the spleen and liver, among others (34). This might explain why we did  
382 not observe significant differences or a consistent parasitic load in these tissues. When



383 we evaluated the number of amastigote nests in the cardiac tissue, our results indicate  
384 that the control group presented a mean of  $2.3 \pm 0.35$  nests/mm<sup>2</sup>, while the animals  
385 treated with memantine (10 mg/kg per day) presented an average of  $1.2 \pm 0.15$   
386 nests/mm<sup>2</sup> in cardiac tissue, which is consistent with the data obtained by using real-  
387 time PCR. Remarkably, this reduction was consistent with that observed when the  
388 inflammatory infiltrates in the cardiac tissue were analyzed. These datasets are  
389 consistent with previously published results that show the susceptibility of amastigote  
390 forms to memantine (11). This is of extreme relevance since the amastigotes are  
391 responsible for maintaining chronic infection in patients. It was shown that amastigotes  
392 can enter a dormant state, which makes them resistant to benznidazole (35). Further  
393 studies should be conducted to evaluate the possible trypanocidal effect of memantine  
394 on dormant amastigotes, which would result in an optimized alternative therapy for  
395 Chagas disease.

396

## 397 **References**

- 398 1. Perez-Molina JA, Molina I. Chagas disease. *Lancet*. 2018;391(10115):82-94.
- 399 2. Alves MJ, Colli W. *Trypanosoma cruzi*: adhesion to the host cell and  
400 intracellular survival. *IUBMB Life*. 2007;59(4-5):274-9.
- 401 3. Boscardin SB, Torrecilhas AC, Manarin R, Revelli S, Rey EG, Tonelli RR, et al.  
402 Chagas' disease: an update on immune mechanisms and therapeutic strategies. *J Cell*  
403 *Mol Med* 2010;14(6B):1373-84.
- 404 4. Rassi A, Marin-Neto JA. Chagas disease. *Lancet*. 2010;375(9723):1388-402.
- 405 5. Sales Junior PA, Molina I, Fonseca Murta SM, Sanchez-Montalva A, Salvador  
406 F, Correa-Oliveira R, et al. Experimental and clinical treatment of Chagas disease: a  
407 review. *Am J Trop Med Hyg* 2017;97(5):1289-303.

- 408 6. Urbina JA. Specific chemotherapy of Chagas disease: relevance, current  
409 limitations and new approaches. *Acta Trop.* 2010;115(1-2):55-68.
- 410 7. Kinnings SL, Liu N, Buchmeier N, Tonge PJ, Xie L, Bourne PE. Drug discovery  
411 using chemical systems biology: repositioning the safe medicine Comtan to treat multi-  
412 drug and extensively drug resistant tuberculosis. *PLoS Comput Biol.*  
413 2009;5(7):e1000423.
- 414 8. Nwaka S, Hudson A. Innovative lead discovery strategies for tropical diseases.  
415 *Nat Rev Drug Discov.* 2006;5(11):941-55.
- 416 9. Paveto C, Pereira C, Espinosa J, Montagna AE, Farber M, Esteva M, et al. The  
417 nitric oxide transduction pathway in *Trypanosoma cruzi*. *J Biol Chem.*  
418 1995;270(28):16576-9.
- 419 10. Silber AM, Colli W, Ulrich H, Alves MJ, Pereira CA. Amino acid metabolic  
420 routes in *Trypanosoma cruzi*: possible therapeutic targets against Chagas' disease. *Curr*  
421 *Drug Targets Infect Disorders.* 2005;5(1):53-64.
- 422 11. Damasceno FS, Barison MJ, Pral EM, Paes LS, Silber AM. Memantine, an  
423 antagonist of the NMDA glutamate receptor, affects cell proliferation, differentiation  
424 and the intracellular cycle and induces apoptosis in *Trypanosoma cruzi*. *PLoS Negl*  
425 *Trop Dis.* 2014;8(2):e2717.
- 426 12. Lipton SA. The molecular basis of memantine action in Alzheimer's disease and  
427 other neurologic disorders: low-affinity, uncompetitive antagonism. *Curr Alzheimer*  
428 *Res.* 2005;2(2):155-65.
- 429 13. Silber AM, Marcipar IS, Roodveldt C, Cabeza Meckert P, Laguens R, Marcipar  
430 AJ. *Trypanosoma cruzi*: identification of a galactose-binding protein that binds to cell  
431 surface of human erythrocytes and is involved in cell invasion by the parasite. *Exp*  
432 *Parasitol.* 2002;100(4):217-25.

- 433 14. Mosmann T. Rapid colorimetric assay for cellular growth and survival:  
434 application to proliferation and cytotoxicity assays. *J Immunol Methods*. 1983;65(1-  
435 2):55-63.
- 436 15. Green LC, Wagner DA, Glogowski J, Skipper PL, Wishnok JS, Tannenbaum  
437 SR. Analysis of nitrate, nitrite, and [15N]nitrate in biological fluids. *Anal Biochem*.  
438 1982;126(1):131-8.
- 439 16. Brener Z. Therapeutic activity and criterion of cure on mice experimentally  
440 infected with *Trypanosoma cruzi*. *Rev. Inst. Med Tropical Sao Paulo*. 1962;4:389-96.
- 441 17. Cummings KL, Tarleton RL. Rapid quantitation of *Trypanosoma cruzi* in host  
442 tissue by real-time PCR. *Mol Biochem Parasitol*. 2003;129(1):53-9.
- 443 18. Zipfel GJ, Babcock DJ, Lee JM, Choi DW. Neuronal apoptosis after CNS  
444 injury: the roles of glutamate and calcium. *J Neurotrauma*. 2000;17(10):857-69.
- 445 19. Parsons CG, Danysz W, Quack G. Memantine is a clinically well tolerated N-  
446 methyl-D-aspartate (NMDA) receptor antagonist--a review of preclinical data.  
447 *Neuropharmacology*. 1999;38(6):735-67.
- 448 20. Danysz W, Parsons CG, Mobius HJ, Stoffler A, Quack G. Neuroprotective and  
449 symptomatological action of memantine relevant for Alzheimer's disease - a unified  
450 glutamatergic hypothesis on the mechanism of action. *Neurotox Res*. 2000;2(2-3):85-  
451 97.
- 452 21. Gonda X. Basic pharmacology of NMDA receptors. *Curr Pharm Des*.  
453 2012;18(12):1558-67.
- 454 22. Von Dongen AM. Biology of the NMDA Receptor. *Front Neurosci*.  
455 2009;978(1):4200-414.

- 456 23. Pereira C, Paveto C, Espinosa J, Alonso G, Flawia MM, Torres HN. Control of  
457 *Trypanosoma cruzi* epimastigote motility through the nitric oxide pathway. J Eukaryot  
458 Microbiol. 1997;44(2):155-6.
- 459 24. Prado PAF. Avaliação do possível efeito dual (antioxidante e/ou pró-oxidante) e  
460 ação neuroprotetora do Ebselen, Ácido caféico e Memantina em células neurais  
461 (NEURO-2A) *in vitro*. In: BIOLÓGICAS UFDMG-IDC, editor. 2012.
- 462 25. Chen SL, Tao PL, Chu CH, Chen SH, Wu HE, Tseng LF, et al. Low-dose  
463 memantine attenuated morphine addictive behavior through its anti-inflammation and  
464 neurotrophic effects in rats. J Neuroimmune Pharm. 2012;7(2):444-53.
- 465 26. Volbracht C, van Beek J, Zhu C, Blomgren K, Leist M. Neuroprotective  
466 properties of memantine in different *in vitro* and *in vivo* models of excitotoxicity. Eur J  
467 Neurosci. 2006;23(10):2611-22.
- 468 27. Giustizieri M, Cucchiaroni ML, Guatteo E, Bernardi G, Mercuri NB, Berretta N.  
469 Memantine inhibits ATP-dependent K<sup>+</sup> conductances in dopamine neurons of the rat  
470 substantia nigra pars compacta. J Pharmacol Exp Ther. 2007;322(2):721-9.
- 471 28. Wu SN, Huang HC, Yeh CC, Yang WH, Lo YC. Inhibitory effect of memantine,  
472 an NMDA-receptor antagonist, on electroporation-induced inward currents in pituitary  
473 GH3 cells. Biochem Biophys Res Commun. 2011;405(3):508-13.
- 474 29. Tsai KL, Chang HF, Wu SN. The inhibition of inwardly rectifying K<sup>+</sup> channels  
475 by memantine in macrophages and microglial cells. Cell Physiol Biochem.  
476 2013;31(6):938-51.
- 477 30. Spentzas T, Shapley RK, Aguirre CA, Meals E, Lazar L, Rayburn MS, et al.  
478 Ketamine inhibits tumor necrosis factor secretion by RAW264.7 murine macrophages  
479 stimulated with antibiotic-exposed strains of community-associated, methicillin-  
480 resistant *Staphylococcus aureus*. BMC Immunol. 2011;12:11.

- 481 31. Lombardi G, Dianzani C, Miglio G, Canonico PL, Fantozzi R. Characterization  
482 of ionotropic glutamate receptors in human lymphocytes. *Br J Pharmacol.*  
483 2001;133(6):936-44.
- 484 32. Tuneva EO, Bychkova ON, Boldyrev AA. Effect of NMDA on production of  
485 reactive oxygen species by human lymphocytes. *Bull Exp Biol Med.* 2003;136(2):159-  
486 61.
- 487 33. Kornhuber J, Quack G. Cerebrospinal fluid and serum concentrations of the N-  
488 methyl-D-aspartate (NMDA) receptor antagonist memantine in man. *Neurosc Lett.*  
489 1995;195(2):137-9.
- 490 34. Melo RC, Brener Z. Tissue tropism of different *Trypanosoma cruzi* strains. *J*  
491 *Parasitol.* 1978;64(3):475-82.
- 492 35. Sanchez-Valdez FJ, Padilla A, Wang W, Orr D, Tarleton RL. Spontaneous  
493 dormancy protects *Trypanosoma cruzi* during extended drug exposure. *eLife.* 2018;7.

## 494 **Legends**

495 **Figure 1. Evaluation of cell viability in RAW 264.7 cells. (A, C and E)** The cells were treated  
496 with different concentrations of memantine (10-800  $\mu\text{M}$ ), incubated for 24, 48 and 72 hours. **(B,**  
497 **D and F)**  $\text{IC}_{50}$  values were obtained from a nonlinear regression curve; the determined  $\text{IC}_{50}$   
498 values were  $580 \pm 22 \mu\text{M}$ ,  $279 \pm 2 \mu\text{M}$  and  $257 \pm 4.7 \mu\text{M}$ , respectively. Comparison among the  
499 groups treated and not treated with memantine ( $p < 0.05$ ). Data are expressed as a percentage  $\pm$   
500 standard deviation.

501

502 **Figure 2. Evaluation of the effect of memantine on the intracellular cycle.** RAW 264.7  
503 macrophages ( $2.5 \times 10^5$  cells/well) infected with trypomastigote forms ( $2.5 \times 10^6$  parasites/well)  
504 from cell culture and incubated with different concentrations of memantine (10-100  $\mu\text{M}$ ) for 72  
505 h. After this time, the cells were incubated with *Hoechst* (1: 2000) for 1 min. Cells were  
506 observed under fluorescence microscopy, using  $\lambda$  350 nm excitation and  $\lambda$  460 emission, and

507 400 cells were counted. Data are expressed as the mean  $\pm$  standard deviation. \* ( $p < 0.05$ ), \*\* ( $p$   
508  $< 0.01$ ). \*\*\* ( $p < 0.001$ ).

509

510 **Figure 3. Effect of memantine on NO production and the evaluation of intracellular**  
511 **calcium levels.** (A) RAW 264.7 macrophages ( $2.5 \times 10^5$  cells/well) were treated with LPS (10  
512  $\mu\text{g/mL}$ ) or not treated. Cells were incubated with different concentrations of memantine (1-100  
513  $\mu\text{M}$ ) for 24 h. After this period, the production of nitrites was evaluated by Griess reaction. (B)  
514 Gene expression of iNOS was evaluated in the presence or absence of LPS (10  $\mu\text{g/mL}$ ) after a  
515 24 h incubation. Total cell RNA was extracted for cDNA synthesis and was analyzed by  
516 quantitative PCR. (C) RAW 264.7 macrophages ( $2.5 \times 10^5$  cells/well) were treated with LPS (10  
517  $\mu\text{g/mL}$ ) or not treated. Cells were incubated with different concentrations of memantine (1-100  
518  $\mu\text{M}$ ) for 24 h. After this time, the cells were incubated with 5  $\mu\text{M}$  fluo-4 AM for 1 h at 33 °C.  
519 The evaluation was performed on the SpectraMax i3 fluorimeter (Molecular Devices), using  $\lambda$   
520 excitation 490 nm and  $\lambda$  emission 518. Data are expressed as a percentage  $\pm$  standard  
521 deviation.\* ( $p < 0.05$ ), \*\* ( $p < 0.01$ ), \*\*\* ( $p < 0.001$ ).

522

523 **Figure 4. Parasitemia and mortality in treated or noninfected BALB/c mice treated with**  
524 **memantine (10 mg/kg per day).** (A) Parasitemia in BALB/c mice infected by the  
525 intraperitoneal route with  $1 \times 10^3$  forms of sanguine trypomastigotes of strain Y of *T. cruzi*. The  
526 number of blood trypomastigotes on days equivalent to the parasitemic peak was evaluated in  
527 infected mice, treated or not treated with memantine (10 mg/kg per day) (N = 40). Comparison  
528 between the groups treated and not treated with memantine ( $p < 0.05$ ). Data are expressed as the  
529 mean  $\pm$  standard deviation. (B) Infected animals treated or not treated with memantine (10  
530 mg/kg per day) (N = 40). Comparison between the groups treated and not treated with  
531 memantine (log-rank test) ( $p < 0.05$ ).

532

533 **Figure 5. Tissue parasitic load, parasite density and inflammatory infiltrate in cardiac**  
534 **tissue.** (A) Measurement of parasitic load at 15 d.p.i. in tissues of BALB/c mice infected with

535  $1 \times 10^3$  forms of sanguine trypomastigotes and nontreated or treated with memantine (MEM) - 10  
536 mg/kg per day - for ten consecutive days. The graph show the number of parasites equivalent to  
537 5 ng of tissue DNA. **(B)** Nests of amastigotes per  $\text{mm}^2$  in cardiac tissue at 15 d.p.i. BALB/c  
538 mice were infected with  $1 \times 10^3$  forms of blood trypomastigotes and were treated with memantine  
539 (MEM) - 10 mg/kg per day - for ten consecutive days. The data are presented in number of nests  
540 per area of the analyzed section. **(C)** Cardiac tissue sections of 5  $\mu\text{m}$  thick were obtained on 15  
541 d.p.i., stained with H & E and analyzed by light microscopy. Areas of inflammatory infiltrates  
542 were quantified by an image analysis system. The sum of infiltrated areas on the six slides was  
543 calculated for each mouse. The final individual score was expressed in square micrometers of  
544 inflammatory infiltrates per square millimeter of area examined. \* ( $p < 0.05$ ). **(D)** Histological  
545 view of the hearts of BALB/c mice infected with sanguine trypomastigotes and nontreated or  
546 treated with memantine (MEM). The figure shows the presence of amastigotes nests  
547 (arrowheads). Scale bar represents 50  $\mu\text{m}$ .

548

549 **Supporting Figure 1. Kinetics of the activation of RAW 264.7 macrophages.** **(A)** Cells of  
550 RAW 264.7 lineage macrophages ( $1 \times 10^6$  cells/well) were treated with different concentrations  
551 of LPS (1-100  $\mu\text{g}/\text{mL}$ ). Cells were incubated for 24 hours. **(B)** Nitrite dosing in the supernatant  
552 of RAW 264.7 lineage macrophage incubated at different times (24 h, 48 h and 72 hours) with  
553 LPS (10  $\mu\text{g}/\text{ml}$ ). After this period, the production of nitrites was evaluated by a Griess reaction.  
554 Data are expressed as a percentage  $\pm$  standard deviation. ( $p < 0.05$ ).

555

556 **Supporting Figure 2. Tissue parasitic load.** Evaluation of the parasitic load at 15 d.p.i. in  
557 tissues of BALB/c mice infected with  $1 \times 10^3$  forms of blood trypomastigotes and treated with  
558 memantine (MEM) - 10 mg/kg per day - for ten consecutive days. **(A)** Intestine (N = 15), **(B)**  
559 Bladder (15), **(C)** Skeletal muscle (N = 15), **(D)** Spleen (15) and **(E)** Liver (N = 15). The graphs  
560 show the number of parasites equivalent to 5 ng of tissue DNA.

**Fig 1**

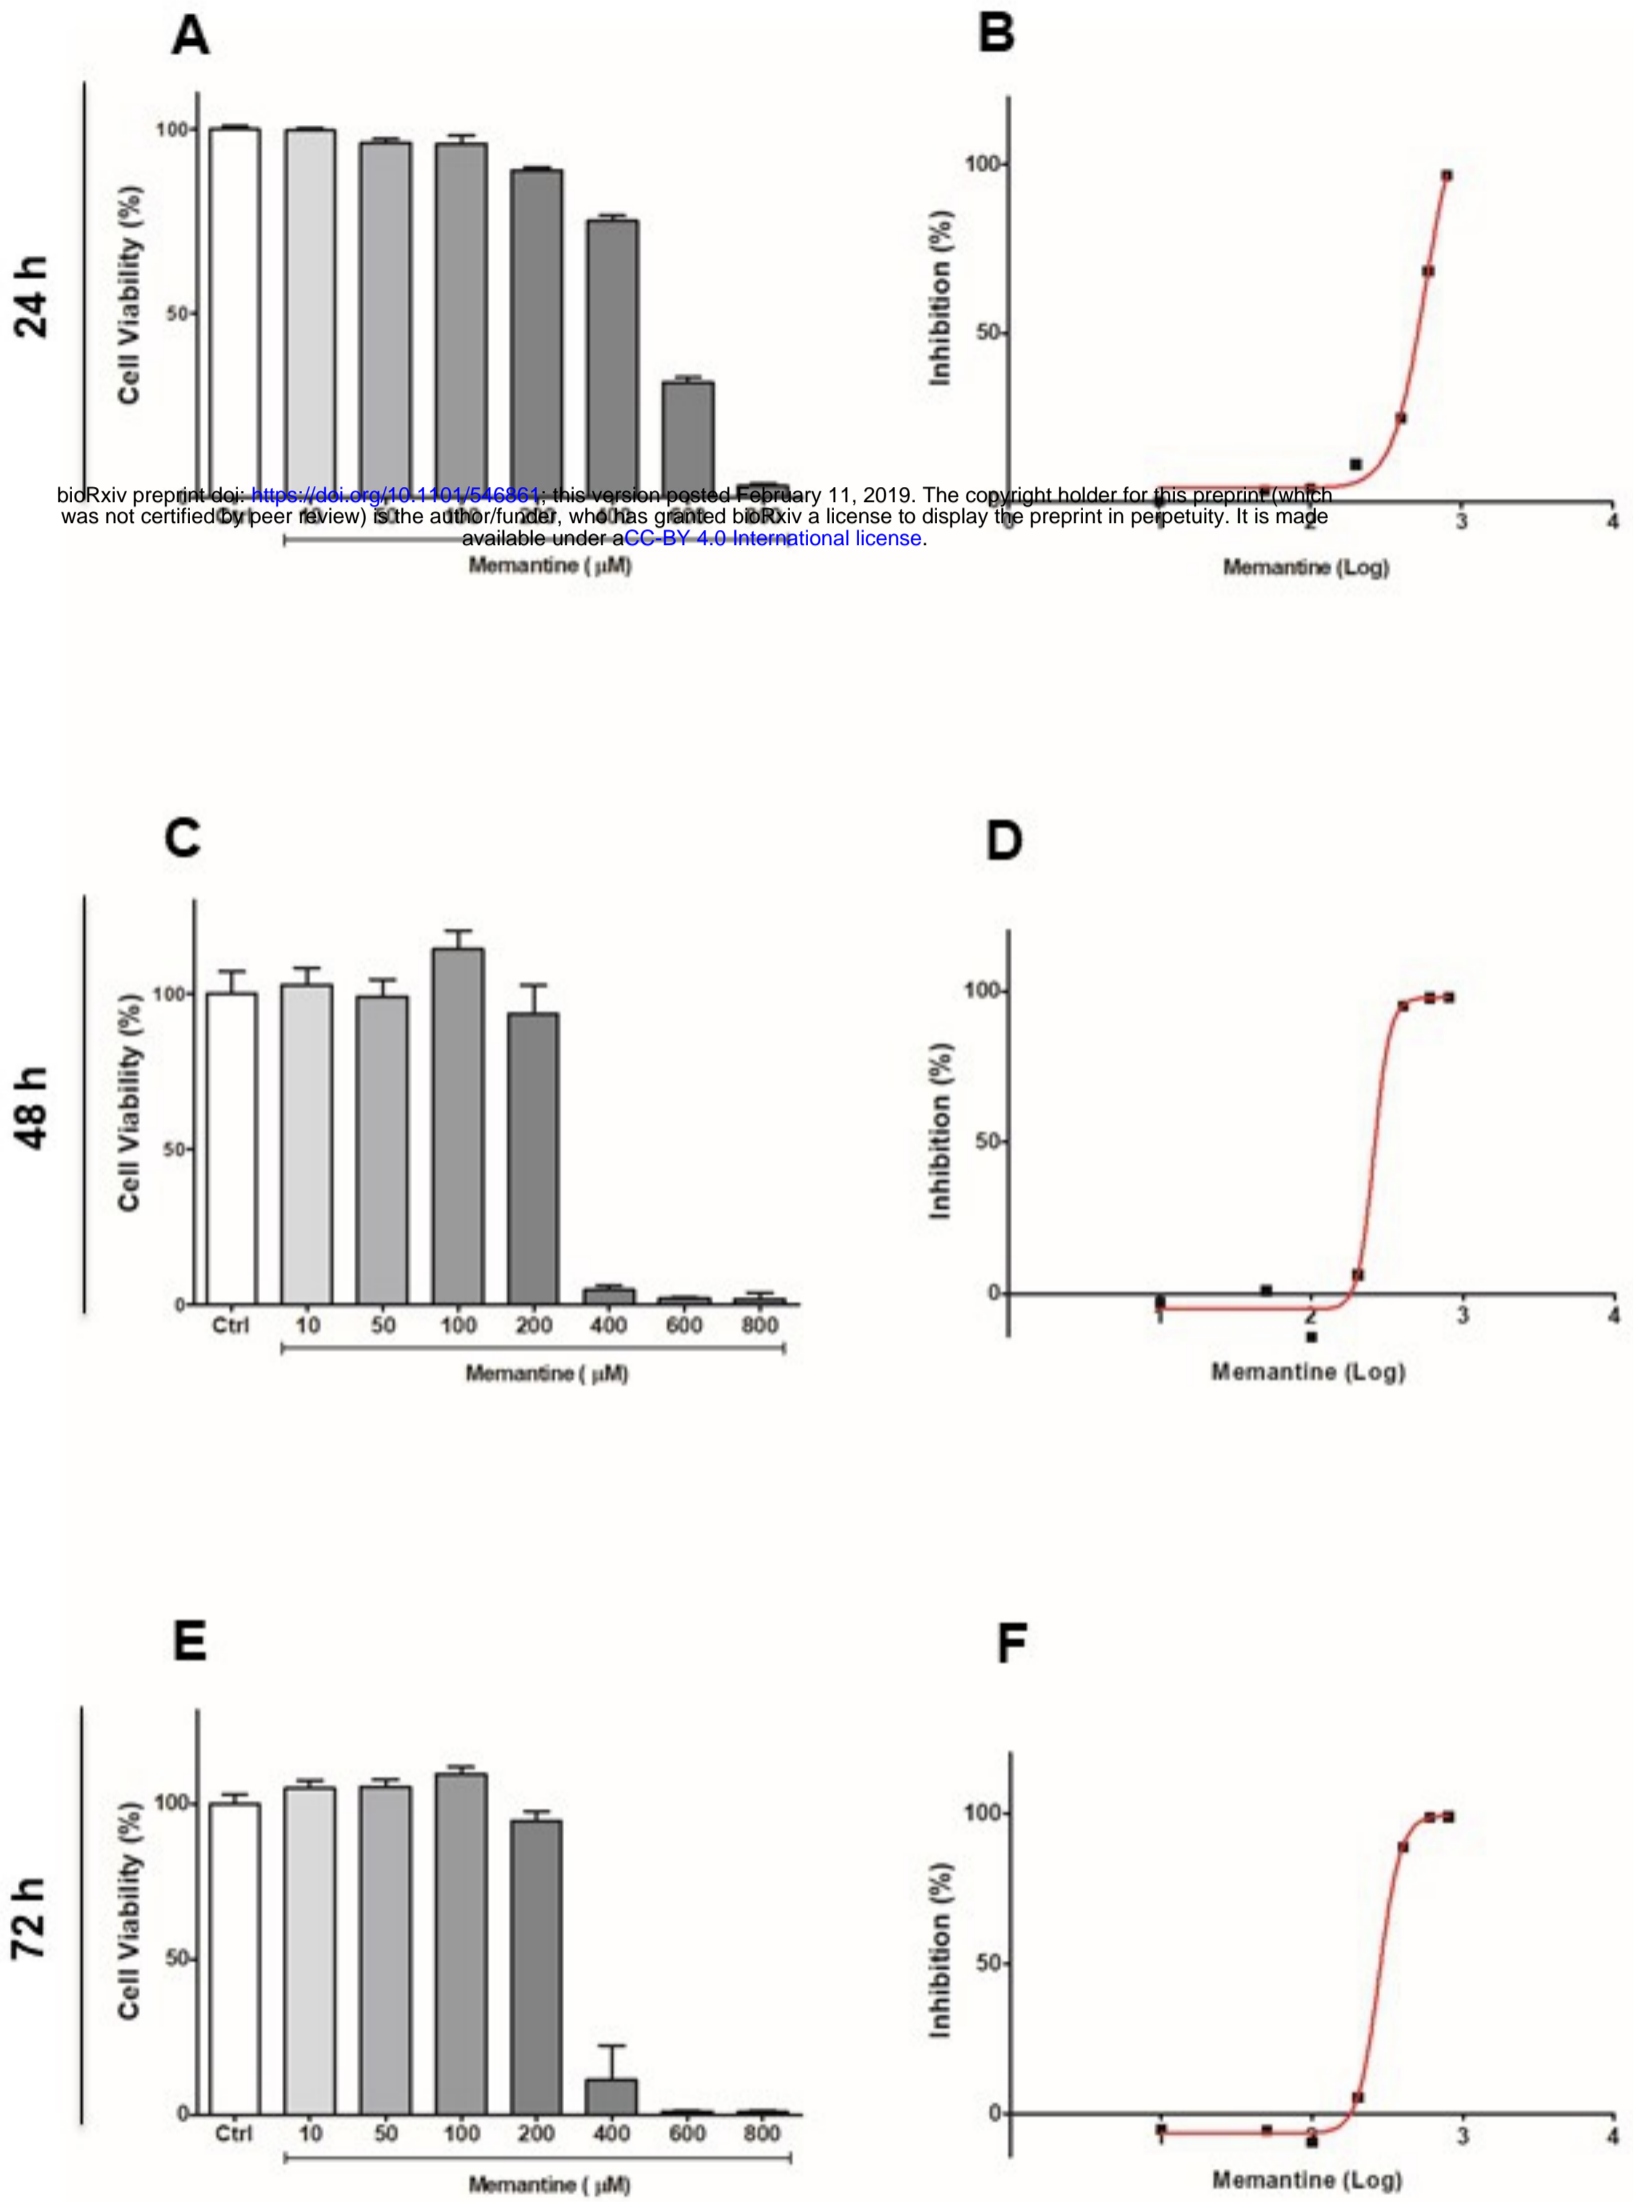

Figure 1



**Fig 2**

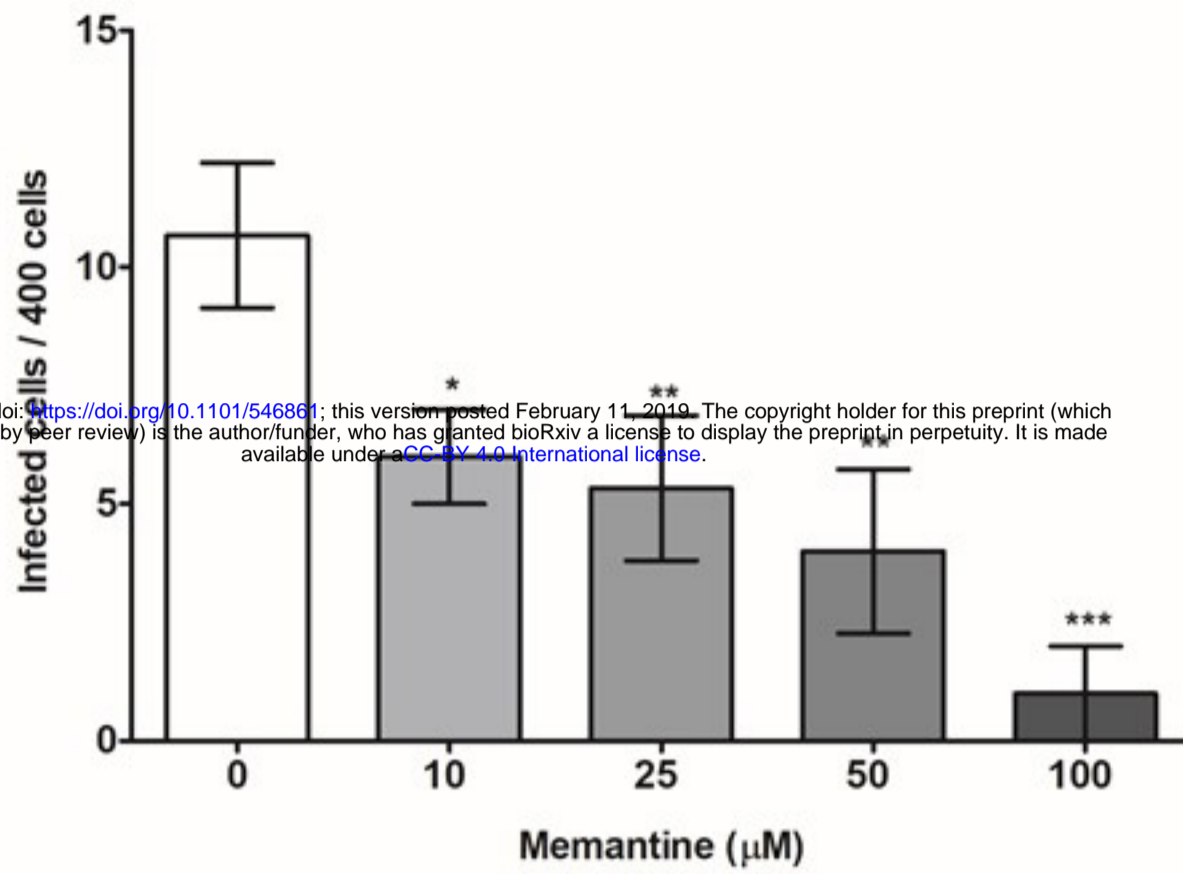

Figure 2

Fig 3

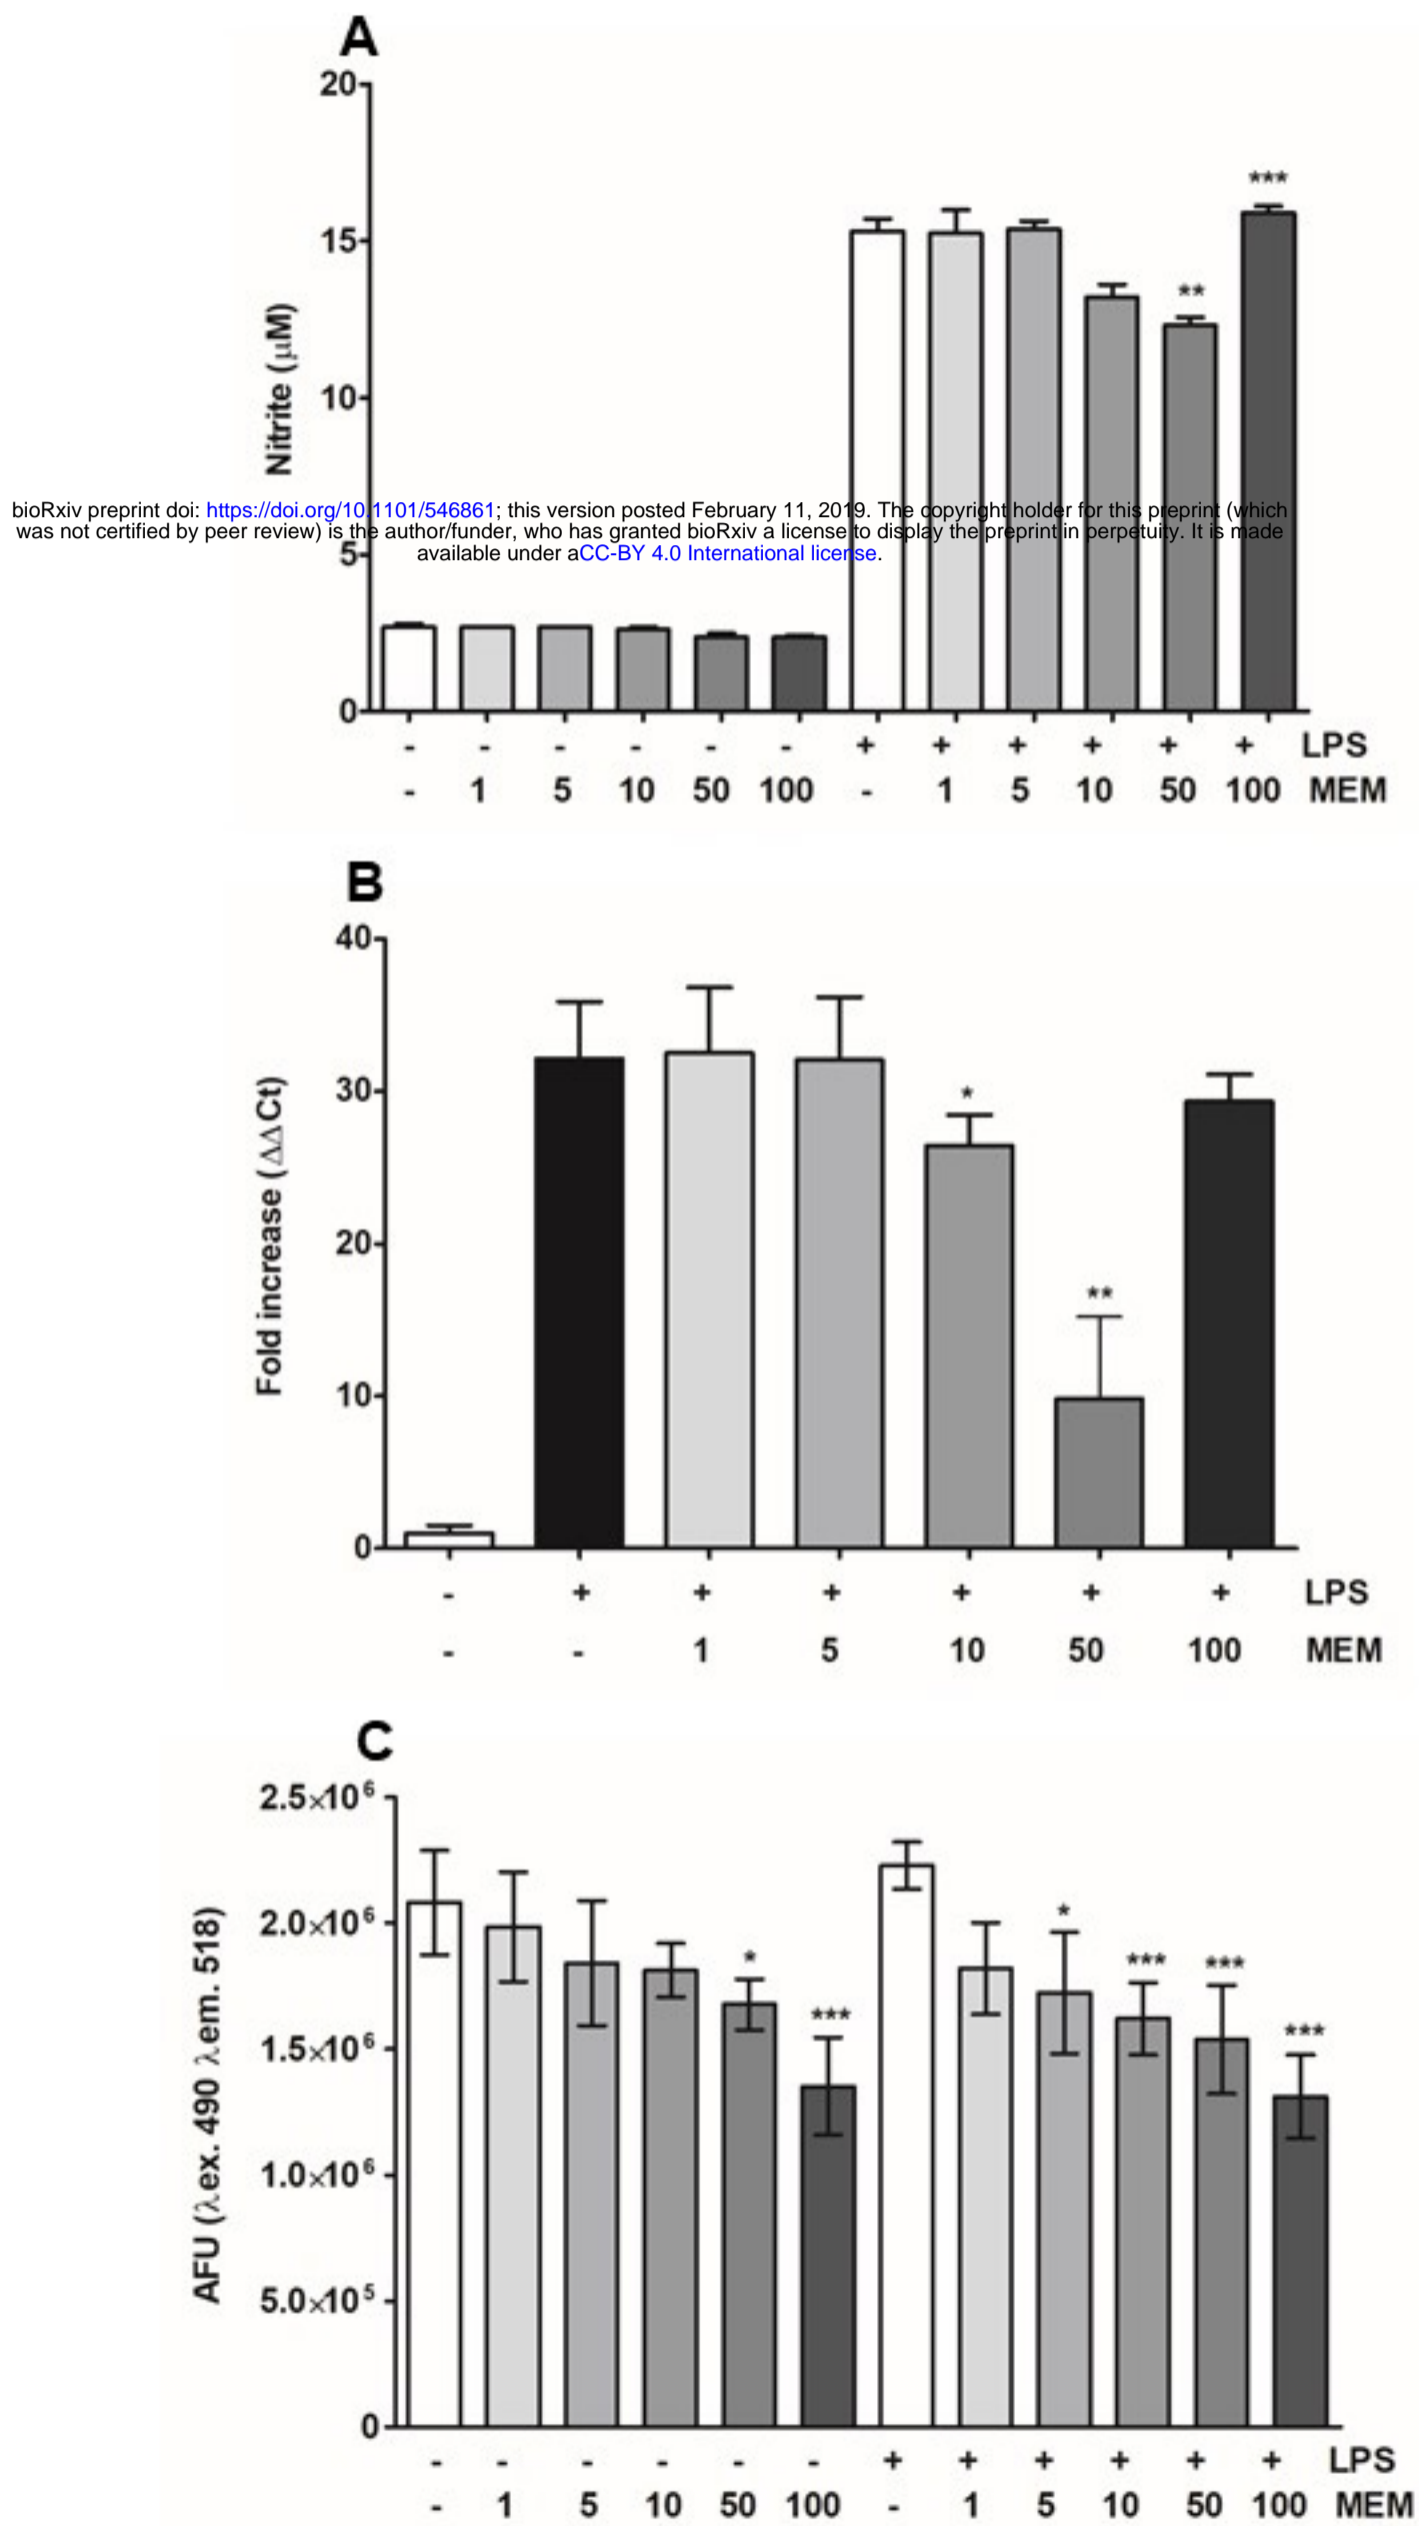

Figure 3

Fig 4

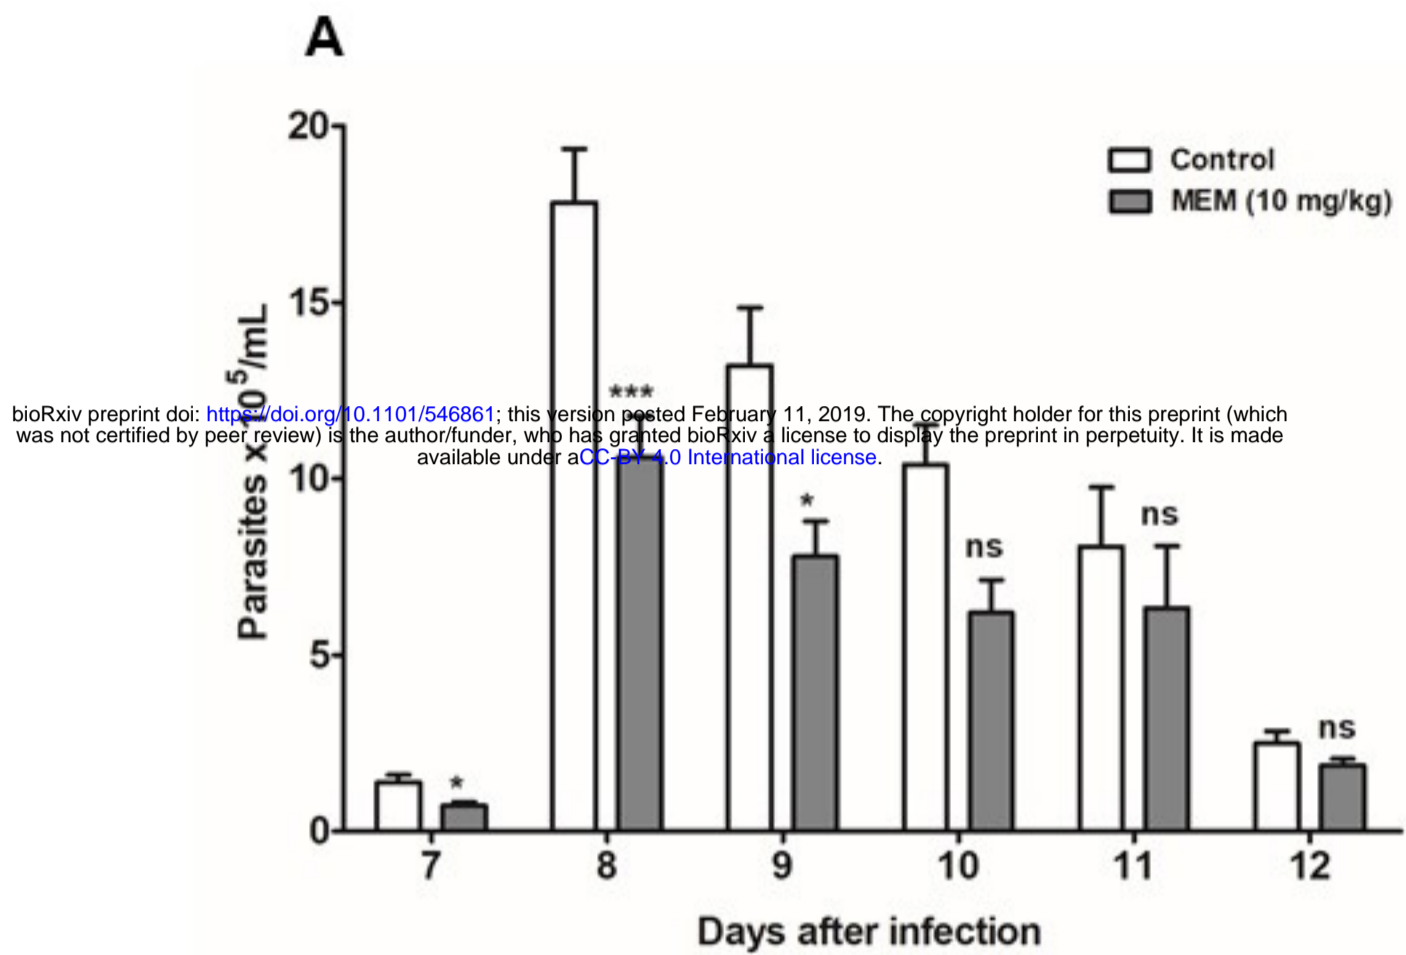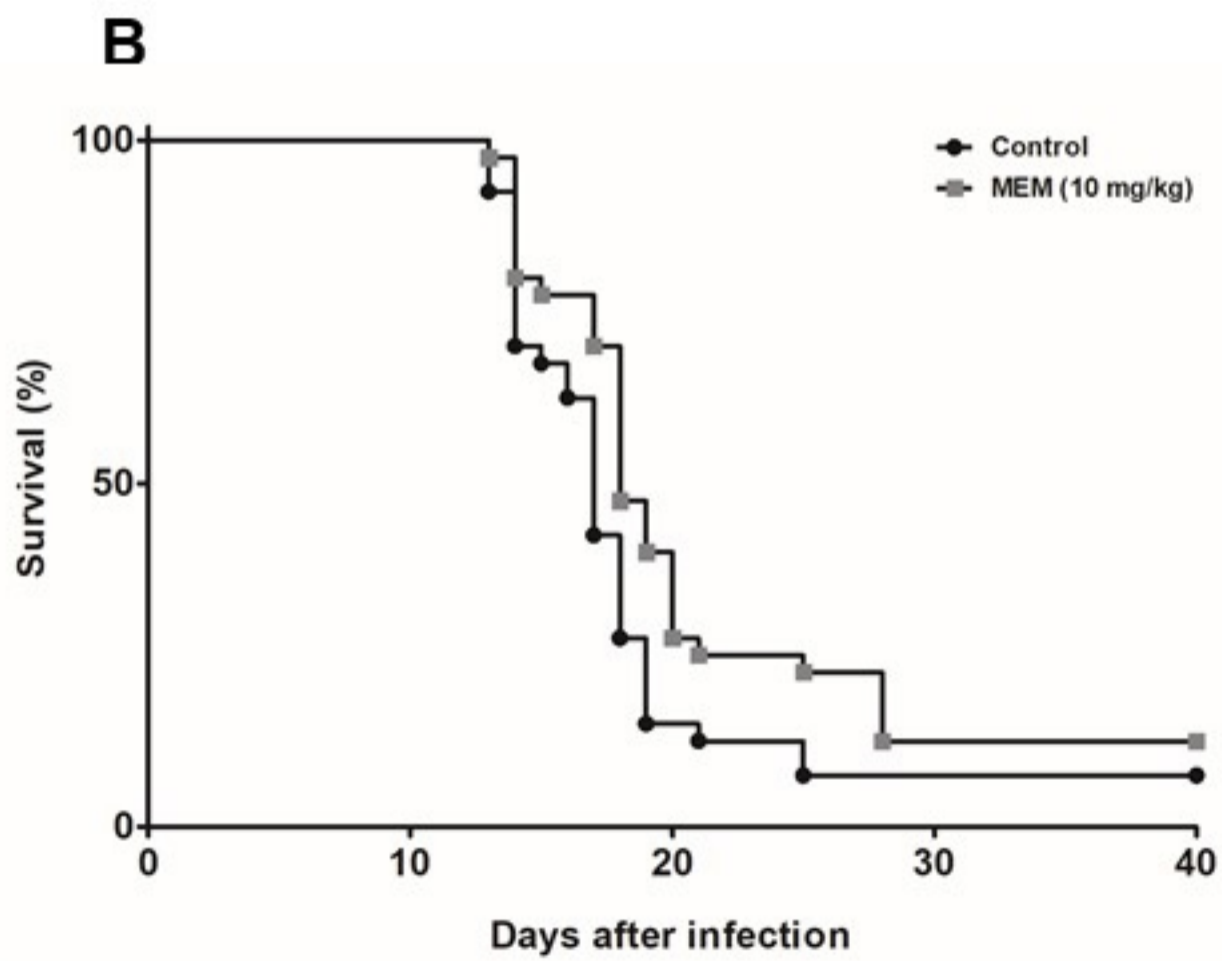

Figure 4

**Fig 5**

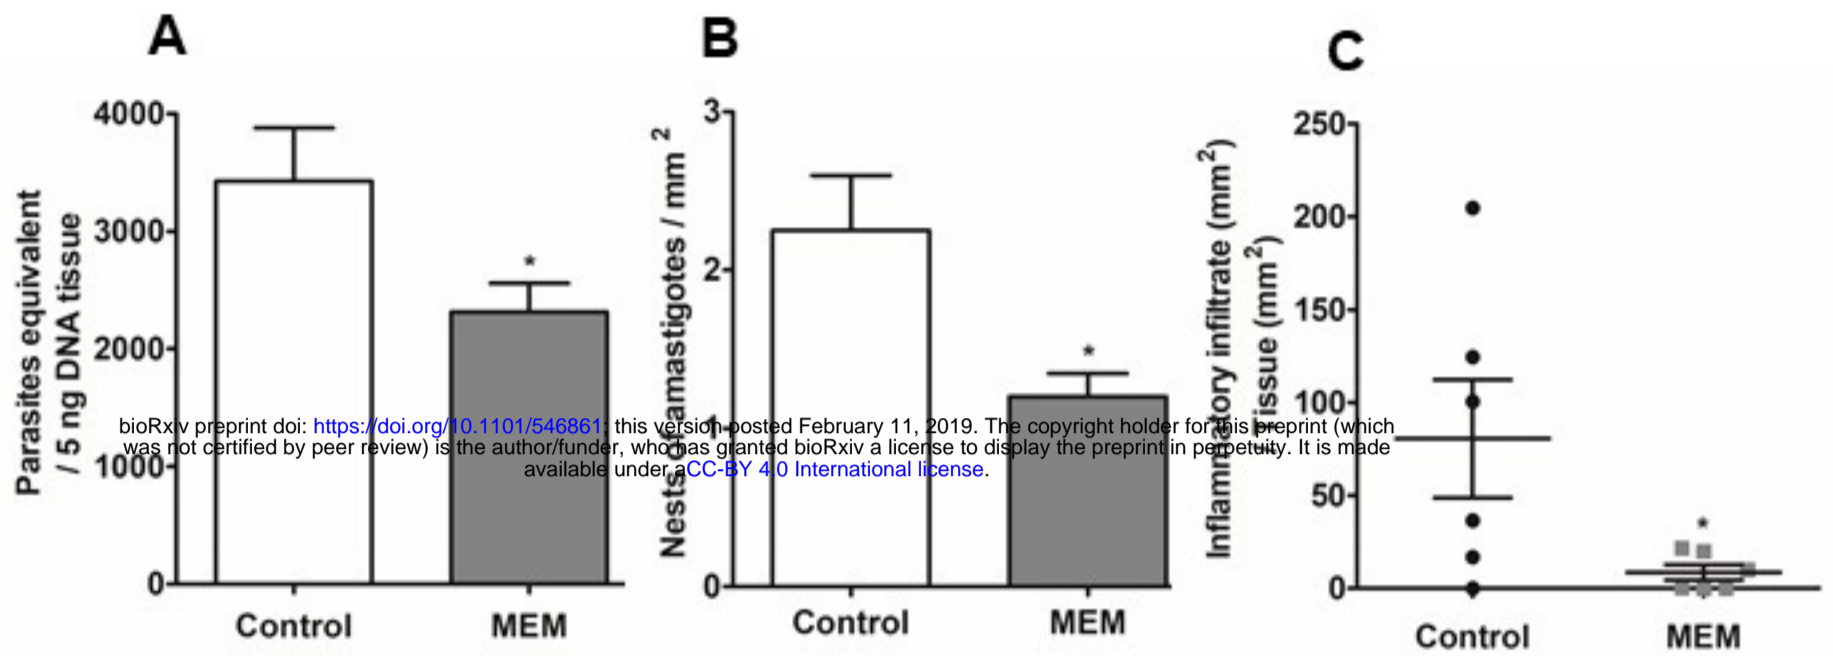

**D**

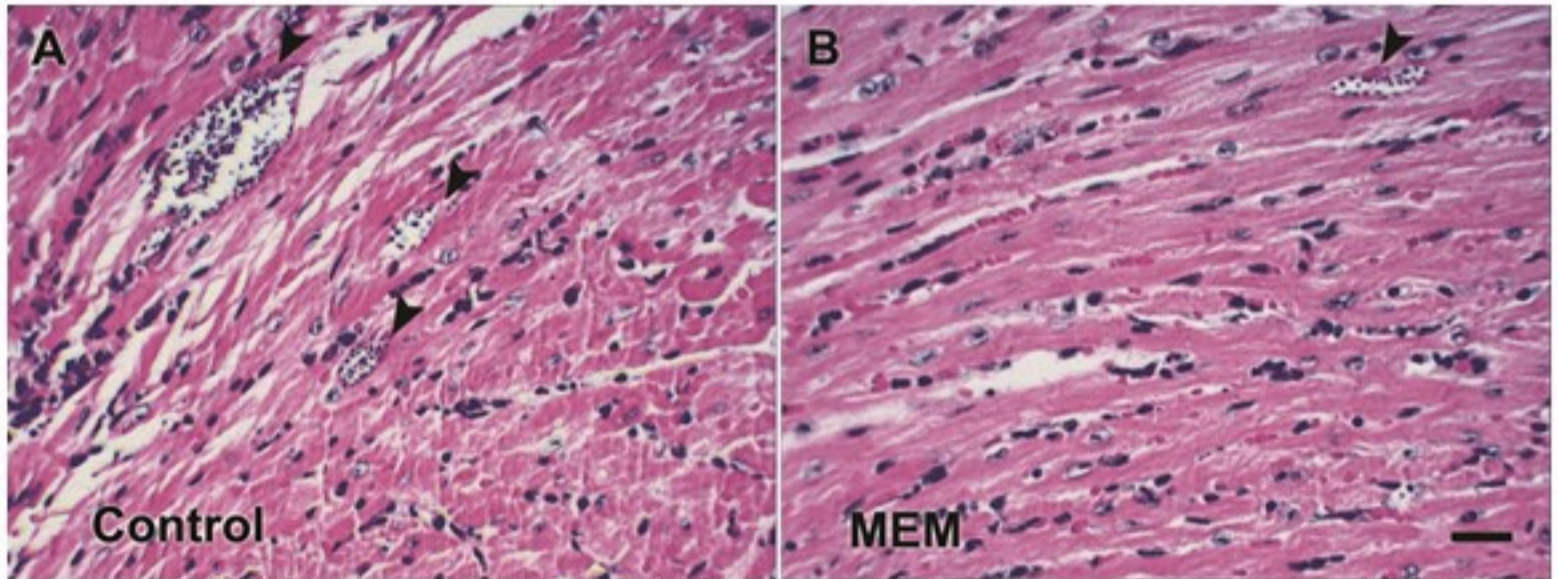

Source: https://www.biorxiv.org/content/10.1101/546861v1.full.pdf
